# Supplementary material
Source: PubMed Central journal article supplement (PMC2713563)
Supplement: supp_284_24_16061__1.pdf [file supp_284_24_16061__1.pdf]

## Jennifer L. Osterhage

---

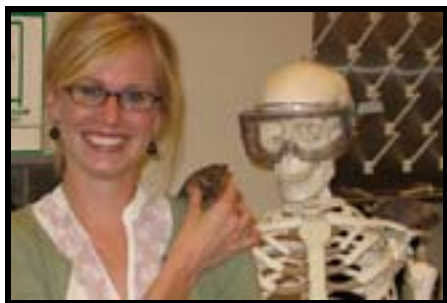

**Current Position:** Assistant Professor of Biology at Hanover College in Hanover, Indiana

**Education:** Ph.D. in Molecular Biology (2007) from Vanderbilt University; B.S. in Biology (2002) from University of Kentucky

**Non-scientific Interests:** Running, water skiing, hiking

During my graduate work in the laboratory of Katherine Friedman at Vanderbilt University, I studied the regulation of telomerase assembly and activity in *Saccharomyces cerevisiae*. After receiving my Ph.D. in 2007, I accepted a faculty position at a small, liberal arts college in southern Indiana. I continue to study telomeres and telomerase at Hanover College with the help of undergraduate students.

---

**Read Dr. Osterhage's article entitled:** Chromosome End Maintenance by Telomerase

<http://www.jbc.org/cgi/content/full/284/24/16061>
